# Supplementary material
Source: PubMed Central journal article supplement (PMC10864058)

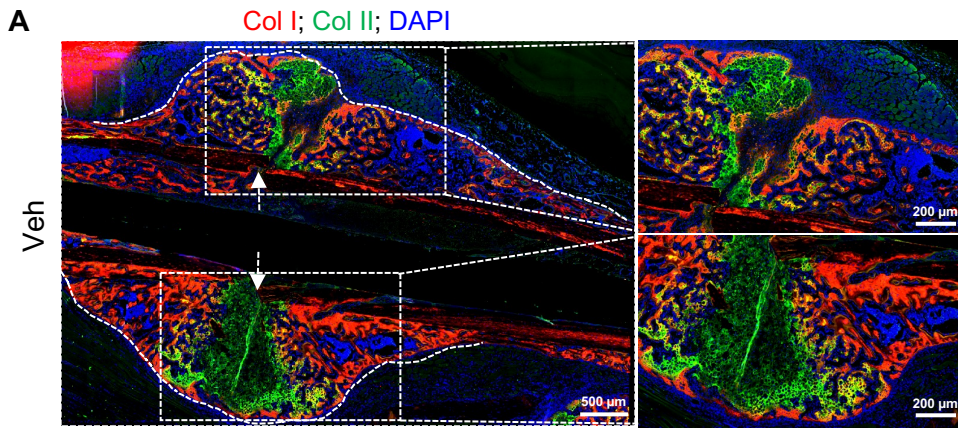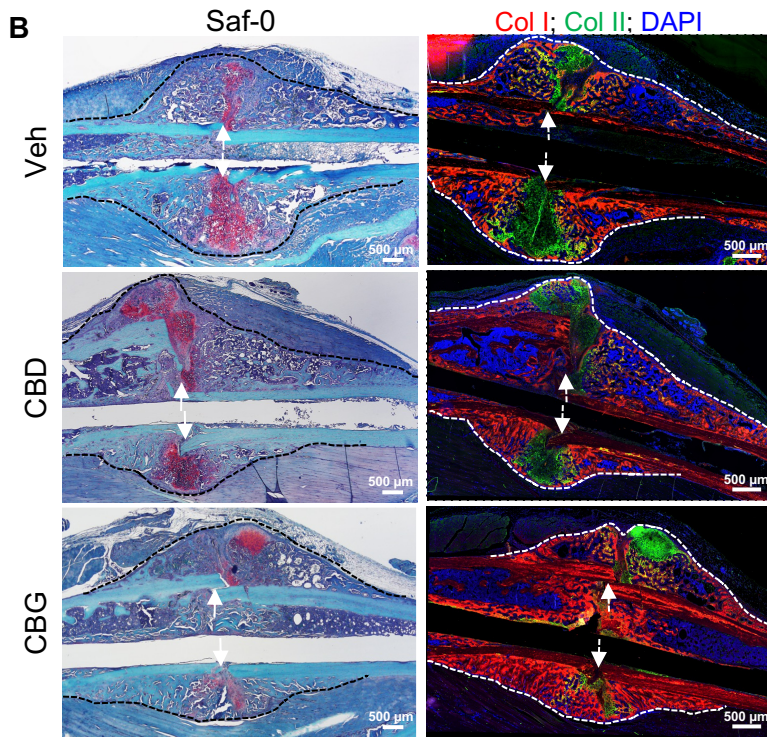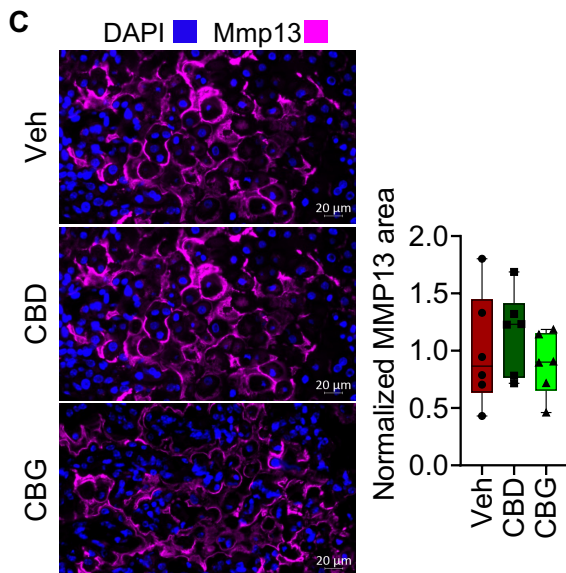

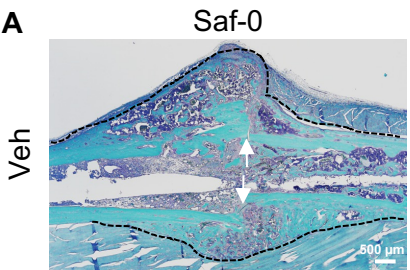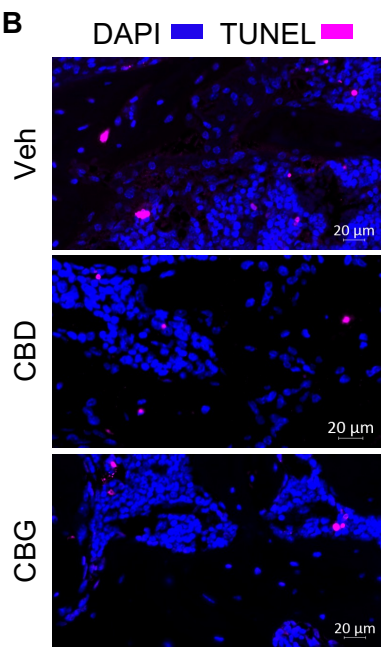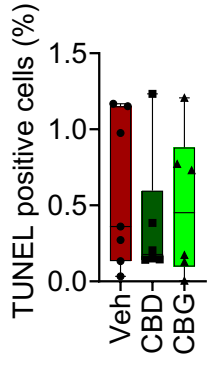

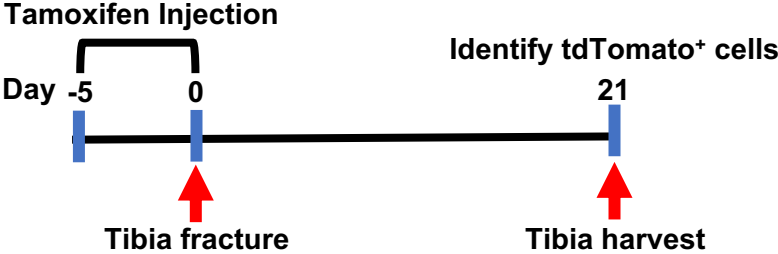

Supplement: NIHMS1939819-supplement-Supinfo3.pdf [file NIHMS1939819-supplement-Supinfo3.pdf]
